# Supplementary material for: Influence of anthropogenic emissions on the composition of highly oxygenated organic molecules in Helsinki: a street canyon and urban background station comparison
Source: Copernicus journal article supplement (doi:10.5194/egusphere-2023-524), 2023-05-08
Supplement: Supplementary file 1 [file egusphere-2023-524-supplement.pdf]

|    |                                                                                                          |
|----|----------------------------------------------------------------------------------------------------------|
| 1  | List of content:                                                                                         |
| 2  | S1. Overview of meteorological variables and trace gases measurements                                    |
| 3  | S2. PMF inputs and validation                                                                            |
| 4  | S3. Factor interpretation                                                                                |
| 5  | S4. Chemical composition of selected factors                                                             |
| 6  | S5. Signal fractions of selected factors                                                                 |
| 7  | S6. Overview of not selected factors                                                                     |
| 8  | S7. Overview of measured VOC at the street canyon                                                        |
| 9  | S8. Correlations of observed factors                                                                     |
| 10 | S9. Examples of difference in diurnal variation of factors between workdays and weekends                 |
| 11 | <b>S1. Overview of meteorological variables and trace gases measurements</b>                             |
| 12 | Table S1. Overview of additional variables measured at the urban background and the street canyon sites. |

| Variable [unit]                              | Instrument / model                                                      | Height of measurement (m) |
|----------------------------------------------|-------------------------------------------------------------------------|---------------------------|
| <b>Urban background station</b>              |                                                                         |                           |
| <b>NO, NO<sub>x</sub> [ppb]</b>              | chemiluminescence analyzer / Horiba APNA 370                            | 4                         |
| <b>O<sub>3</sub></b>                         | UV-absorption / Teledyne Instruments API 400E                           | 4                         |
| <b>SO<sub>2</sub> [ppb]</b>                  | UV fluorescence analyzer / Thermo Fisher Scientific TEI 43iTLE          | 4                         |
| <b>Relative humidity [%]</b>                 | Vaisala HMP243                                                          | 29                        |
| <b>Air temperature [°C]</b>                  | Pentronic Pt100                                                         | 4                         |
| <b>Wind direction [°]</b>                    | 2D ultrasonic anemometer/ Thies Clima 2.1x                              | 32                        |
| <b>Wind speed [m/s]</b>                      | 2D ultrasonic anemometer/ Thies Clima 2.1x                              | 32                        |
| <b>Global radiation [W/m<sup>2</sup>]</b>    | Kipp and Zonen CNR1                                                     | 32                        |
| <b>Black carbon</b>                          | Multi Angle Absorption Photometer (MAAP), Thermo Scientific, Model 5012 | 4                         |
| <b>Street canyon</b>                         |                                                                         |                           |
| <b>NO, NO<sub>x</sub> [µg/m<sup>3</sup>]</b> | chemiluminescence analyzer / Horiba APNA 370                            | 4                         |
| <b>O<sub>3</sub> [µg/m<sup>3</sup>]</b>      | UV fluorescence analyzer / Horiba APOA-370                              | 4                         |
| <b>Relative humidity [%]</b>                 | Vaisala WXT 536                                                         | 4                         |
| <b>Air temperature [°C]</b>                  | Vaisala WXT 536                                                         | 4                         |
| <b>Wind direction [°]</b>                    | Vaisala WXT 536                                                         | 4                         |
| <b>Wind speed [m/s]</b>                      | Vaisala WXT 536                                                         | 4                         |
| <b>Black carbon</b>                          | Optical analyzer / MAAP 5012                                            | 4                         |

## 14 S2. PMF inputs and validation

### 15 Data preparation

16 PMF analysis was performed on three different m/Q ranges from UMR data at each station: 200-350 Th, 350-500 Th, and  
17 500-650 Th (range 1, 2, and 3). The time resolution of the input data was 30 minutes. At the urban background station,  
18 during most of the studied time, we detected water clusters; the impurities formed by clustering water molecules with  
19 reagent ions. Their appearance in the ambient sample depends on the settings of CI-API-TOF and the sampled RH. For  
20 range 1, water clusters were a weighty fraction of the spectrum, thus they were taken out from the data set before running  
21 PMF. We removed data at  $188 + n \cdot 18$  and  $251 + n \cdot 18$  Th which correspond to  $(\text{HNO}_3)_{2-3}(\text{H}_2\text{O})_n\text{NO}_3^-$  molecules.  
22 Additionally, the reagent ion tetramer  $(\text{HNO}_3)_3\text{NO}_3^-$  (251 Th) had a big contribution in the dataset at the urban background  
23 site, thus it was removed from the PMF analysis. At the street canyon water clusters and  $(\text{HNO}_3)_3\text{NO}_3^-$  were not detected.

### 24 Selecting number of factors

25 We performed PMF analysis for a 2-7 factor solution for each range at both stations. For each solution, we analyzed a  
26 diagnostic parameter  $Q/Q_{\text{exp}}$  (Canonaco et al., 2013), which for an ideal PMF run without downweighing would decrease  
27 to 1. Since we downweighed errors, we do not expect  $Q/Q_{\text{exp}}$  to equal 1 but rather stabilize. In all cases we observed  
28 stabilization of  $Q/Q_{\text{exp}}$  value; however, this parameter itself was usually not conclusive enough to determine the number  
29 of solutions. Only for range 3 at the street canyon we chose a number of factors primarily based on  $Q/Q_{\text{exp}}$  (Fig. S1). For  
30 that range, 3-factor solution gives  $Q/Q_{\text{exp}}$  value closest to 1. We chose 3 factors solution also for range 3 at the urban  
31 background station. Factor UB3-3 is the only daytime factor in this range and including it in the solution, clarified results  
32 of factors 1 and 2. At the same time including more factors did not bring any new information to the solution. For the rest  
33 of the PMF solutions at both sites, we chose a 5- or 6-factor solution. We used time series, diurnal variations, and mass  
34 spectral profiles to estimate the relevance of different factor solutions for our study. We looked for spectral features or  
35 time behaviors that we could associate with atmospheric processes. Alternatively, we included an additional factor if its  
36 characteristics differed from all proceeding factors in that solution. In all cases, the unexplained fraction of the spectrum  
37 for chosen solution stays between 9 and 12.1%.

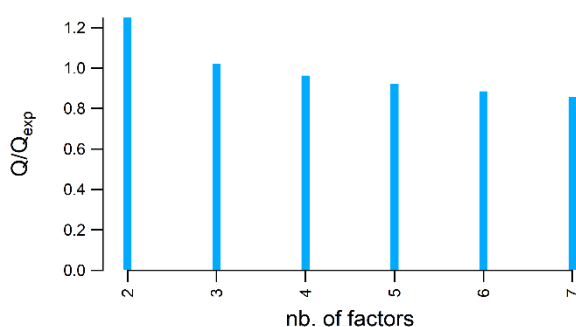

38  
39 Figure S1.  $Q/Q_{\text{exp}}$  value for 2-7 factors solution for range 3 at street canyon site.

### 40 S3. Factor interpretation

41 In this section, we describe PMF factors and the reasons behind the suggested VOC types, oxidants, terminators, and  
42 inhibitors in Tables 1 and S3. As mentioned in section 1,  $\text{O}_3$  and  $\text{NO}_3$  are selective towards compounds that they react  
43 with in the atmosphere, while OH reacts with almost any compound. The chemoselectivity of  $\text{NO}_3$  and  $\text{O}_3$  towards

VOC results in a mass spectrum with a clear pattern, observed before in laboratory experiments (e.g., Ehn et al., 2014; Dam et al., 2022) and ambient measurements (e.g., Yan et al., 2016). At the same time, a mass spectra containing HOM oxidized by OH looks messier, as OH oxidized most VOC in the atmosphere. In the description of factors, we say that we observe chemoselectivity of the oxidant when we notice a pattern in the mass spectrum, and we call the oxidant not chemoselective when there is no pattern in the mass spectrum. We are not able to analyze the influence of HO<sub>2</sub> as a terminator, thus HO<sub>2</sub> could potentially be a terminator for all the factors, except for factors UB3-2 and SC3-1, which must be terminated by RO<sub>2</sub>. All key compounds were detected as clusters with NO<sub>3</sub><sup>-</sup>, however, for clarity of the interpretation we write their chemical structures in the descriptions without the NO<sub>3</sub><sup>-</sup> adduct.

- Street canyon

- Selected factors

All factors from range one at street canyon are marked as 'not selected', thus the description of selected factors at street canyon starts with range 2. The timeseries of the SC factors are shown in Figure 3 in the main text, while spectra are presented in Figure S2.

#### SC2-1, "MT monomers 1"

**Temporal behavior:** SC2-1 factor is a daytime factor reaching maximum concentration at 13:00, suggesting that either OH• or O<sub>3</sub> is the main oxidant.

**Spectral features:** The key compounds contain C<sub>10</sub>H<sub>16</sub>O<sub>8-10</sub>N<sub>0-2</sub> and/or C<sub>9</sub>H<sub>14,16</sub>O<sub>9-10</sub>N<sub>2</sub> (Table S2) suggesting biogenic origin of this factor- MT. The pattern in mass spectrum suggests chemoselectivity of the oxidant towards VOC precursors (Fig. S2), which could imply that the main oxidant is O<sub>3</sub>, even though OH could also participate in oxidation reactions. The presence of ONCs suggests that NO is the main terminator.

**Other:** SC2-1 correlates with *SC1-1: nitrophenol 1* (R=0.79), *SC1-5: nitrophenol & aliphatic* (R=0.70), *SC3-2: photooxidation* (R=0.80) as well as *UB1-2: nitrophenol* (R=0.75), and *UB1-6: C7-8* (R=0.66).

#### SC2-2, "370+433"

**Temporal behavior:** SC2-2 reaches the highest concentrations during nighttime at 11 p.m., but it is also present during the morning. Diurnal variation suggests NO<sub>3</sub> or O<sub>3</sub> as oxidants.

**Spectral features:** SC2-2 is a factor mostly driven by one compound: C<sub>10</sub>H<sub>16</sub>O<sub>9</sub>N<sub>2</sub> (Table S2), which is detected as two separate clusters (370 Th with NO<sub>3</sub><sup>-</sup> and 433 Th with HNO<sub>3</sub>NO<sub>3</sub><sup>-</sup>).

**Other:** SC2-2 correlates with *SC1-4: unidentified 2* (R=0.62), *UB2-4: MT monomers 3* (R=0.75) as well as CO<sub>2</sub> (R=0.60) and NO<sub>2</sub> (R=0.58). SC2-2 and *B2-4: MT monomers 3* are both factors driven mostly by C<sub>10</sub>H<sub>16</sub>O<sub>9</sub>N<sub>2</sub>, however, *UB2-4: MT monomers 3* contains also other compounds.

#### SC2-3, "MT monomers 2"

**Temporal behavior:** SC2-3 reaches the highest concentrations during nighttime, but it is also slightly elevated between 11:00 and 16:00. Nighttime behavior suggests that NO<sub>3</sub> is the main oxidant. A morning drop of SC2-3 corresponds to an increase in NO; this indicates that NO may act as an inhibitor for the formation of this factor.

78 **Spectral features:** The key compounds contain  $C_{10}H_{16}O_{10-11}N_{0.2}$ , which suggests a biogenic origin: MT. The presence of  
79 ONCs confirms that  $NO_3$  may be the main oxidant.

80 **Other:** SC2-3 correlates with *SC3-1: MT dimers* ( $R=0.72$ ) and *UB3-2: MT dimers* ( $R=0.62$ ), both are factors containing  
81 MT dimers. This suggests that SC2-3 could be also terminated by  $RO_2$ .

## 82 SC3-1, "MT dimers"

83 **Temporal behavior:** SC3-1 is a nighttime factor with a maximum at 23:00. Since SC3-1 is a nighttime factor,  $OH^\bullet$  does  
84 not participate in the oxidation reactions. The diurnal variation suggests that NO is not involved in the termination of this  
85 factor, and it acts as an inhibitor.

86 **Spectral features:** SC3-1 contains  $C_{20}H_{32}O_{11-15}N_2$  (Table S2), which are MT dimers. This implies that  $RO_2$  terminates  
87 the formation of SC3-1. The presence of ONCs suggests that  $NO_3$  is the dominant oxidant for this factor.

88 **Other:** SC3-1 correlates with *SC2-3: MT monomers 2* ( $R=0.72$ ) and *UB3-2: MT dimers* ( $R=0.77$ ).

## 89 SC3-2, "photooxidation"

90 **Temporal behavior:** SC3-2 is a daytime factor reaching maximum at 13:00 when it is responsible for approximately 50%  
91 of the measured signal in this range (Fig. S4). Due to diurnal variation, SC3-2 is most likely terminated by NO.

92 **Spectral features:** The mass spectrum of SC3-2 is noisy and without a visible pattern (Fig. S3), thus the oxidant is most  
93 likely not chemoselective. That points at OH as the main oxidant. Nevertheless,  $O_3$  could also act as an oxidant. SC3-2  
94 contains HOM with 19 or 20 carbons, though identification of many key compounds is hindered by the low S/N ratio.  
95 SC3-2 contains HOM, noise, and F-impurities.

96 **Other:** SC3-2 correlates with many other factors at the street canyon. It has the highest correlation with *SC2-1: MT*  
97 *monomers 1* ( $R=0.80$ ) and it also correlates with *UB1-6: C7-8* ( $R=0.77$ ).

- 98
  - Not selected factors

99

100 The timeseries, spectra and diurnal profiles for "not selected" factors at UB can be found in Figure S6.

## 101 SC1-1, "nitrophenol 1"

102 **Temporal behavior:** SC1-1 is daytime factor with maximum at 13:00. Diurnal variation suggests that  $OH^\bullet$  or  $O_3$  are  
103 oxidants involved in the formation of this factor.

104 **Spectral features:** SC1-1 consists of  $C_6H_5O_3N$ ,  $C_7H_7O_3N$ ,  $C_6H_5O_3NHNO_3$ ,  $C_{10}H_{15}O_8N$ . The mass spectrum contains  
105 mainly nitrophenol, which suggests an anthropogenic origin of SC1-1. SC1-1 includes ONCs, which implies an  
106 involvement of  $NO_x$ .

107 **Other:** SC1-1 correlates with many factors at street canyon: *SC1-2: MT monomers 3* ( $R=0.87$ ), *SC2-1: MT monomers 1*  
108 ( $R=0.79$ ), and *SC3-2: photooxidation* ( $R=0.77$ ) as well as with *UB2-4: MT monomers 3* ( $R=0.66$ )

109 **Reason for not "selecting":** SC1-1 has very similar temporal trend to other factors in this range at the street canyon. As  
110 PMF solutions are less reliable for this m/Q range at street canyon, we did not want to put too much focus on this factor.

111 **SC1-2, "MT monomers 3"**

112 **Temporal behavior:** SC1-2 is a daytime factor with a maximum at 13:00, which suggests that OH or O<sub>3</sub> are involved in  
113 the formation of this factor.

114 **Spectral features:** SC1-2 contain C<sub>7</sub>H<sub>10</sub>O<sub>4</sub>, C<sub>9</sub>H<sub>15</sub>O<sub>6</sub>N, C<sub>10</sub>H<sub>15</sub>O<sub>7</sub>N, C<sub>10</sub>H<sub>17</sub>O<sub>7</sub>N or C<sub>10</sub>H<sub>15</sub>O<sub>8</sub>, and C<sub>10</sub>H<sub>15</sub>O<sub>8</sub>N, suggesting  
115 the biogenic origin of VOCs- MT. SC1-2 often contains ONCs, implying an involvement of NO.

116 **Other:** SC1-2 correlates with *SC1-1: nitrophenol 1* (R=0.87), *SC2-1: MT monomers 1* (R=0.79), *SC3-2: photooxidation*  
117 (R=0.71), and with *UB1-6: C7-8* (R=0.63). Factor SC1-2 is very similar to SC1-1.

118 **Reason for not "selecting":** SC1-2 has very similar temporal trend to other factors in this range at the street canyon. As  
119 PMF solutions are less reliable for this m/Q range at street canyon, we did not put too much focus on this factor.

120 **SC1-3, "unidentified 1"**

121 **Temporal behavior:** SC1-3 is a factor elevated from 12:00 to 23:00. That suggests O<sub>3</sub> as the most dominant oxidant.

122 **Spectral features:** SC1-3 contains nitrophenol and only a few peaks from which we cannot identify any compound with  
123 certainty.

124 **Other:** SC1-3 correlates with *SC3-2: photooxidation* (R=0.67) and *UB1-6: C7-8* (R=0.74).

125 **Reason for not "selecting":** SC1-3 has very similar temporal trends to other factors in this range at the street canyon. As  
126 PMF solutions are less reliable for this m/Q range at street canyon, we did not put too much focus on this factor.  
127 Additionally, we were not able to identify key compounds for this factor and that makes interpretation of SC1-3 limited.

128 **SC1-4, "unidentified 2"**

129 **Temporal behavior:** SC1-4 is a factor elevated during most of the time except between 16:00 and 21:00 (Fig. S6).

130 **Spectral features:** SC1-4 contains nitrophenol. We cannot identify any other key compounds for SC1-4.

131 **Other:** SC1-4 correlates with *SC2-2: 370+433* (R=0.62), CO<sub>2</sub> (R=0.50).

132 **Reason for not "selecting":** SC1-4 has very similar temporal trends to other factors in this range at the street canyon. As  
133 PMF solutions are less reliable for this m/Q range at street canyon, we did not put too much focus on this factor.  
134 Additionally, we were not able to identify key compounds for this factor and that makes interpretation of SC1-4 limited.

135 **SC1-5, "nitrophenol & aliphatic"**

136 **Temporal behavior:** SC1-5 is a daytime factor with a maximum at 2 p.m. (Fig. S6), which suggests OH or O<sub>3</sub> as the  
137 main oxidant.

138 **Spectral features:** SC1-5 contains: C<sub>6</sub>H<sub>5</sub>O<sub>3</sub>N, C<sub>5</sub>H<sub>7</sub>O<sub>6</sub>N, C<sub>6</sub>H<sub>9</sub>O<sub>6</sub>N, C<sub>6</sub>H<sub>11</sub>O<sub>6</sub>N, C<sub>7</sub>H<sub>11</sub>O<sub>6</sub>N, C<sub>7</sub>H<sub>9</sub>O<sub>7</sub>N and/or C<sub>8</sub>H<sub>13</sub>O<sub>6</sub>N,  
139 C<sub>6</sub>H<sub>10</sub>O<sub>8</sub>N<sub>2</sub>, C<sub>7</sub>H<sub>12</sub>O<sub>8</sub>N<sub>2</sub> or C<sub>8</sub>H<sub>12</sub>O<sub>9</sub>, C<sub>8</sub>H<sub>12</sub>O<sub>9</sub>N<sub>2</sub> or C<sub>9</sub>H<sub>14</sub>O<sub>9</sub>N. Key compounds include nitrophenol as well as ions  
140 previously detected in China and identified as the product of oxidation of aliphatic VOCs (Guo et al., 2022; Liu et al.,  
141 2021), implying that SC1-5 is formed of anthropogenic VOCs. Almost all key compounds are ONCs suggesting an  
142 involvement of NO in the formation of SC1-5. There is no clear pattern in a mass spectrum (Fig. S6), suggesting that the  
143 main oxidant is not chemoselective: OH.

144 **Other:** SC1-5 correlates with *SC2-1: MT monomers 1* (R=0.70) and *UB1-2: nitrophenol* (R=0.63)

145 **Reason for not “selecting”:** SC1-5 has very similar temporal trends to other factors in this range at the street canyon. As

146 PMF solutions are less reliable for this m/Q range at street canyon, we did not put too much focus on this factor.

147 **SC2-4, "unidentified 3"**

148 **Temporal behavior:** SC2-4 is a daytime factor with a maximum at 14:00 (Fig. S6), which suggests OH or O<sub>3</sub> as the main

149 oxidant.

150 **Spectral features:** Factor SC2-4 has similar time series to factors SC2-1 and SC2-2, which makes it impossible to

151 determine a molecular composition of key compounds. The oxidant is most likely not chemoselective towards VOCs,

152 which suggests OH as the most dominant oxidant (Fig. S6). However, O<sub>3</sub> may also play a role as an oxidant for SC2-4

153 formation.

154 **Other:** SC2-4 correlates with *SC2-3: MT monomers 2* (R=0.64) and *UB1-6: C7-8* (R=0.56).

155 **Reason for not “selecting”:** We were not able to identify key compounds for this factor as it has too similar temporal

156 behavior with SC2-1 and SC2-2. This makes interpretation of SC2-4 limited.

157 **SC2-5, "unidentified 4"**

158 **Temporal behavior:** SC2-5 is a daytime factor with a maximum at 14:00 (Fig. S6), which suggests OH or O<sub>3</sub> as the main

159 oxidant.

160 **Spectral features:** SC2-5 is driven mostly by one peak at 355 Th. The lack of a pattern in the mass spectrum (Fig. S6)

161 indicate an oxidant which is not chemoselective towards VOCs precursors, thus most likely this factor is formed through

162 OH oxidation. O<sub>3</sub> could also partly participate in formation of this factor.

163 **Other:** SC2-5 correlates with *SC1-2: MT monomers 3* (R=0.67), and *UB2-5: photooxidation 1* (R=0.73)

164 **Reason for not “selecting”:** SC2-5 contains mainly one unidentified peak. Signals of other ions are too small to be

165 determined as key compounds of this factor (Fig. S6).

166 **SC3-3, "unidentified 5"**

167 **Temporal behavior:** SC3-3 has no clear pattern in time series or diurnal variation (Fig. S6).

168 **Spectral features:** Mass spectrum shows only noise (Fig. S6).

169 **Other:** SC3-3 does not have any important correlations.

170 **Reason for not “selecting”:** Mass spectrum and diurnal variation of SC3-3 implies that this factor contains mainly

171 instrumental noise. We did not observe any HOM in this factor.

172     • Urban background station

173     • Selected factors

174 The timeseries of the UB factors are shown in Figure 4 in the main text, while spectra are presented in Figure S3.

175 **UB1-2, "nitrophenol"**

176 **Temporal behavior:** Daytime maximum at 12:00 suggests an involvement of OH (Fig. 4).

177 **Spectral features:** UB1-2 contains mainly C4-10 compounds. The double bond equivalent (DBE) between 2 and 6 of  
178 key compounds indicates that some of them may have an aromatic ring (Table S2). UB1-2 includes nitrophenol  
179 ( $C_6H_5O_3N$ ), known as a biomass burning combustion tracer as well as a compound formed from benzene and phenol  
180 oxidation, which are AVOCs. This suggests that compounds in UB1-2 were formed from AVOCs. There is no clear  
181 pattern in the mass spectrum (Fig. S3), which may indicate that the oxidant does not show chemoselectivity towards the  
182 type of VOC precursors. This combined with the information from diurnal variation suggests the involvement of OH in  
183 oxidation reactions. UB1-2 often contains N, suggesting the participation of  $NO_x$  in the termination reaction.

184 **Other:** UB1-2 correlates the best with global radiation ( $R=0.60$ ), which also suggests the participation of OH in oxidation  
185 reactions. UB1-2 has a negative correlation with a cosine of wind direction ( $R=-0.55$ ) indicating that this factor is rather  
186 coming from south of the station. UB1-2 correlates also with factor *SC2-1: MT monomers 1* ( $R=0.75$ ), and factor *UB2-*  
187 *5: photooxidation 1* ( $R=0.57$ ). Correlation with factor UB2-5 could be explained by a similar oxidation mechanism.

188 **UB1-6, "C7-8"**

189 **Temporal behavior:** UB1-6 has a daytime maximum at 17:00 (Fig. 4) showing similarities to the diurnal variation of  $O_3$   
190 concentrations.  $O_3$  or OH could be the oxidant for formation of UB1-6.

191 **Spectral features:** UB1-6 contains C7-8 compounds, which were previously reported from MT oxidation with non-zero  
192  $NO_x$  concentration (Pullinen et al., 2020; Yan et al., 2020) and in ambient measurement (Liu et al., 2021). At the same  
193 time, these compounds were found as HOM formed from aromatic VOCs (Guo et al., 2022). A pattern in the mass  
194 spectrum (Fig. S3) suggests chemoselectivity of the oxidant towards VOC precursors implying that  $O_3$  may be the  
195 dominant oxidant. UB1-6 contains ONCs, which suggests an involvement of NO.

196 **Other:** UB1-6 correlates with three factors at street canyon: *SC1-3: unidentified 1* ( $R=0.74$ ), *SC2-1: MT monomers 1*  
197 ( $R=0.66$ ), and *SC3-2: 370+433* ( $R=0.77$ ). UB1-6, *S1-3: unidentified 1*, and *SC2-1: MT monomers 1* have the same  
198 oxidation mechanism. UB1-6 also correlates with temperature ( $R=0.76$ ) and  $O_3$  concentration ( $R=0.55$ ) suggesting  $O_3$  as  
199 the main oxidant.

200 **UB2-1, "MT monomers 1"**

201 **Temporal behavior:** UB2-1 is a daytime factor with two maxima: at 5:00 and 21:00 (Fig. 4), which correspond to the  
202 time of sunrise and sunset during the measurement period (Fig 1). That suggests that UB1-2 is a factor rather driven by  
203 the chemical condition of the atmosphere during these periods of the day and not by local emissions. Unique diurnal  
204 variation implies that UB2-1 could be oxidized by nighttime  $NO_3$  and terminated mostly by daytime NO.

205 **Spectral features:** Key compounds contain  $C_{9-10}H_{14,16-17}O_{9,11-12}N_{1-3}$  (Table S2), which suggests MT as initial VOCs. UB2-  
206 1 contains N, which suggests an involvement of one or both reagents leading to ONCs: NO and  $NO_3$ .

207 **Other:** UB2-1 does not correlate with any other factor or analyzed parameter.

208 **UB2-2, "MT monomers 2"**

209 **Temporal behavior:** UB2-2 has the highest concentrations during the nighttime with a maximum at 21:00, however, it  
210 has also a daytime local maximum at 11:00. (Fig. 4). Since UB2-2 is mostly present during nighttime, OH probably does  
211 not play an important role in oxidation. The drop in the concentration in the morning corresponds to the appearance of  
212 NO and increase of another factor at the urban background (UB2-4). NO may act as an inhibitor for UB2-2 partly leading  
213 to the formation of UB2-4.

214 **Spectral features:** Key compounds of UB2-2 contain  $C_{9-10}H_{14-15,17}O_{9-11}N_{1-3}$  (Table S2), which indicates that this factor is  
215 formed from biogenic VOCs - MT. Since all key compounds are ONCs and NO rather acts as an inhibitor, not terminator,  
216 UB2-2 is mostly likely oxidized by  $NO_3$ . However, we cannot exclude some participation from  $O_3$  in oxidation.

217 **Other:** UB2-2 correlates with *UB3-2: MT dimers* ( $R=0.65$ ) and *SC2-3: MT monomers 2* ( $R=0.56$ ). Since *UB3-2: MT*  
218 *dimers* contain MT dimers, UB2-2 could be also terminated by  $RO_2$ . UB2-2 has a negative correlation with  $NO_x$  ( $R=$  -  
219 0.45) suggesting that NO is not participating in termination reactions.

#### 220 UB2-3, "sesquiterpene 1"

221 **Temporal behavior:** UB2-3 is a nighttime factor with a maximum at 23:00 (Fig. 4), thus  $NO_3$  or  $O_3$  is most likely the  
222 oxidant and UB2-3 is formed during the absence of NO.

223 **Spectral features:** Key compounds of this factor contain  $C_{15}H_{23-24}O_{8,10,12-13}N$  (Table S2), implying that this factor is  
224 formed from biogenic VOCs- sesquiterpenes. UB2-3 often contains N, which suggests an involvement of  $NO_3$ .  $O_3$  could  
225 also participate in oxidation.

226 **Other:** UB2-3 correlates with *UB3-1: sesquiterpene 2* ( $R=0.93$ ).

#### 227 UB2-4, "MT monomers 3"

228 **Temporal behavior:** UB2-4 is a daytime factor with a maximum at 7:00 (Fig. 4), which suggests NO as the main  
229 terminator for the formation mechanism. Either oxidant could be responsible for the formation of that factor, however,  
230  $O_3$  and OH are more likely due to their diurnal behavior.

231 **Spectral features:** The main peaks present in the mass spectrum are  $C_{10}H_{16}O_9N_2$  (370 Th) and  $C_{10}H_{16}O_9N_2HNO_3$  (433  
232 Th). The key compounds contain  $C_{9-10}H_{14,16}O_{9-11}N_{0-2}$  (Table S2), which suggests the biogenic origin of the VOC  
233 precursors – MT.

234 **Other:** It correlates with *SC1-1: nitrophenol 1* ( $R=0.66$ ), *SC2-2: 370+433* ( $R=0.75$ ), and  $NO_2$  ( $R=0.61$ ).

#### 235 UB2-5, "photooxidation 1"

236 **Temporal behavior:** UB2-5 is a daytime factor with a maximum at 12:00 (Fig. 4), at that time it corresponds to more  
237 than 50% of the signal at this range (Fig. S5). The diurnal variation suggests that UB2-5 is oxidized mainly by OH.

238 **Spectral features:** The mass spectrum of UB2-5 has no clear pattern in it, which suggests OH as the main oxidant (Fig.  
239 S3). Due to the low signal-to-noise ratio, there are only two HOM, ONCs, identified as key ions:  $C_{10}H_{11}O_9N$  and  
240  $C_{10}H_{16}O_9N_2$  (Table S2). The presence of ONCs suggests that HOM in UB2-5 are terminated by NO. UB2-5 most likely  
241 contains VOCs oxidized by OH and a noise. We cannot exclude  $O_3$  as an oxidant for this factor.



242 **Other:** UB2-5 correlates with *UB3-3: photooxidation 2* ( $R=0.77$ ), and relative humidity ( $R=0.77$ ). UB2-5 and UB3-3 are  
243 formed most likely by the oxidation with  $\text{OH}\cdot$ .

#### 244 **UB3-1, "sesquiterpene 2"**

245 **Temporal behavior:** UB3-1 is a nighttime factor with a maximum at 11:00 (Fig. 4). The highest concentrations of UB3-  
246 1 correspond to the time when NO is absent, thus NO works as an inhibitor for this factor. As UB3-1 is a nighttime factor,  
247 OH is not involved in the oxidation.

248 **Spectral features:** Key compounds contain  $\text{C}_{15}\text{H}_{24-25}\text{O}_{13-16}\text{N}_{1-2}$  (Table S2), which suggests a biogenic origin of VOCs,  
249 likely sesquiterpenes based on the number of C and H. The presence of ONC implies that UB3-1 is formed by  $\text{NO}_3$   
250 oxidation, however, we cannot exclude  $\text{O}_3$  as an oxidant.

251 **Other:** UB3-1 correlates with *UB2-3: sesquiterpene 1* ( $R=0.93$ ).

#### 252 **UB3-2, "MT dimers "**

253 **Temporal behavior:** UB3-2 is a nighttime factor staying elevated between 23:00 and 3:00 (Fig. 4), which suggests that  
254 OH is not involved in oxidation. UB3-2 is present when the NO is absent implying that NO acts as an inhibitor for this  
255 factor.

256 **Spectral features:** UB3-2 contains as key compounds dimers of MT:  $\text{C}_{17-18}\text{H}_{26}\text{O}_{14-16}\text{N}_{0-2}$ ,  $\text{C}_{20}\text{H}_{30-32}\text{O}_{13-16}\text{N}_{0-2}$ , and possibly  
257  $\text{C}_{19}\text{H}_{30}\text{O}_{13}\text{N}_2$  (Table S2). Since UB3-2 contains dimers, the formation of this factor must be terminated by  $\text{RO}_2$ . The  
258 presence of ONC implies that  $\text{NO}_3$  is the main oxidant, however,  $\text{O}_3$  could also be involved in oxidation reactions.

259 **Other:** UB3-2 correlates with *UB2-2: photooxidation 1* ( $R=0.65$ ), *SC3-1: MT dimers* ( $R=0.77$ ).

#### 260 **UB3-3, "photooxidation 2"**

261 **Temporal behavior:** UB3-3 is a daytime factor with a maximum at 12:00, which represents 60% of the measured signal  
262 at this range during morning and noon (Fig. S5). The diurnal variation suggests that UB3-1 is oxidized mainly by OH.

263 **Spectral features:** The mass spectrum of UB3-3 is noisy and does not show any pattern (Fig. S3), implying not  
264 chemoselective main oxidant: OH. The only compounds identified in this factor were F-impurities. Since UB3-3  
265 sometimes contains more than 50% of the measured signal, we suspect that it also contains HOM which we cannot identify  
266 due to the low S/N ratio.

267 **Other:** UB3-3 correlates with *UB2-5: photooxidation 1* ( $R=0.77$ ) and relative humidity ( $R=0.57$ ).

268 

- Not selected factors

269 The timeseries, spectra and diurnal profiles for "not selected" factors at UB can be found in Figure S7.

#### 270 **UB1-1, "Water clusters"**

271 **Temporal behavior:** Nighttime maximum at 4:00. Present only periodically. The time series and the diurnal variation  
272 correspond to the time series and diurnal variation of water clusters confirming that UB1-1 contains mostly isotopes of  
273 water clusters.

274 **Spectral features:** The mass spectrum of factor UB1-1 contains mostly m/Q 1 and 2 Th higher than m/Q of removed  
 275 water clusters (Fig. S7). Key compounds of that spectrum were identified as isotopes of water clusters.

276 **Other:** UB1-1 correlates with RH (R= 0.63).

277 **Reason for not “selecting”:** UB1-1 contains only isotopes of water clusters, an artefact.

278 **UB1-3, "unidentified 1"**

279 **Temporal behavior:** UB1-3 has two maxima: daytime at 13:00 and nighttime at 23:00 (Fig. S7), suggesting that  
 280 atmospheric condition at the station does not drive that factor.

281 **Spectral features:** UB1-3 is never a dominant factor during the campaign and its key compounds correspond to key  
 282 compounds of other factors from this range; thus, the only key compound identified is C<sub>9</sub>H<sub>14</sub>O<sub>8</sub>N<sub>2</sub>. It is likely that either  
 283 NO, NO<sub>3</sub>, or both are involved in the formation of UB1-3. We cannot identify which oxidant participates in the formation  
 284 of that factor. However, the lack of a pattern in mass spectrum may indicate that the oxidant is not chemoselective towards  
 285 VOC precursors (Fig. S7). This makes O<sub>3</sub> the less likely oxidant to participate in the formation of B1-3.

286 **Other:** UB1-3 correlates with *UB2-2: MT monomers 1* (R=0.61) and *SCI-2: MT monomers 3* (R=0.61).

287 **Reason for not “selecting”:** UB1-3 is never a dominant factor, and its key compounds correspond to key compounds of  
 288 other factors from this range; thus, we were able to identify only one compound. This makes interpretation of UB1-3  
 289 limited.

290 **UB1-4, "unidentified 2"**

291 **Temporal behavior:** UB1-4 has a maximum at 5:00 and it reaches the lowest concentrations between 8:00 and 13:00  
 292 (Fig. S7). The diurnal variation suggests that NO does not participate in the termination reaction of that factor.

293 **Spectral features:** Mass spectrum of UB1-4 is dominated by only a few peaks from which we cannot certainly identify  
 294 any compound.

295 **Other:** UB1-4 has a negative correlation with *UB1-5: unidentified 3* (R=-0.59).

296 **Reason for not “selecting”:** We are not able to undoubtedly identify any compound in UB1-4.

297 **UB1-5, "unidentified 3"**

298 **Temporal behavior:** UB1-5 is a daytime factor elevated between 10:00 and 16:00 (Fig. S7). That suggests an  
 299 involvement of O<sub>3</sub> or OH in the oxidation. Diurnal variation of B1-5 shows higher concentrations when NO is present at  
 300 the background station (Fig. S7 and Fig. 2).

301 **Spectral features:** UB1-5 is a daytime factor with a mass spectrum mostly driven by one m/Q (261 Th, Fig. S7), which  
 302 cannot be identified. The only compound which we can certainly identify is C<sub>10</sub>H<sub>16</sub>O<sub>8</sub>N (339 Th). The mass spectrum  
 303 contains several more pronounced peaks with odd m/Q which could be radicals, or due to the nitrogen rule, ONC with an  
 304 odd number of nitrogen molecules. HOM in UB1-5 may be terminated by NO or HO<sub>2</sub>, but NO is presumably the one  
 305 terminator more involved in the HOM formation. There is no clear pattern in the mass spectrum (Fig. S7), which may

306 indicate that the oxidant is not chemoselective towards VOC precursors. This suggests OH as more likely oxidant than  
 307 O<sub>3</sub>.

308 **Other:** UB1-5 correlates with *UB2-5: photooxidation 1* (R=0.58) and *SC2-1: MT monomers 1* (R=0.70)

309 **Reason for not “selecting”:** We are not able to undoubtedly identify most of the key compounds in UB1-5.

#### 310 S4. Chemical composition of selected factors

311 Table S2. Representative peaks identified in the selected factors at the street canyon (SC) and at the urban background  
 312 (UB) stations.

| Range [Th]                      | Factor                | Composition                                                                                                                                                                                                                                                                                                                                                                                                                                                                                                                                                                                                                                                                    |
|---------------------------------|-----------------------|--------------------------------------------------------------------------------------------------------------------------------------------------------------------------------------------------------------------------------------------------------------------------------------------------------------------------------------------------------------------------------------------------------------------------------------------------------------------------------------------------------------------------------------------------------------------------------------------------------------------------------------------------------------------------------|
| <b>Street canyon</b>            |                       |                                                                                                                                                                                                                                                                                                                                                                                                                                                                                                                                                                                                                                                                                |
| 350-500                         | SC2-1: MT monomers 1  | 354: C <sub>10</sub> H <sub>16</sub> O <sub>8</sub> N <sub>2</sub> NO <sub>3</sub> -<br>356: C <sub>9</sub> H <sub>14</sub> O <sub>9</sub> N <sub>2</sub> NO <sub>3</sub> - or/and C <sub>10</sub> H <sub>16</sub> O <sub>9</sub> NNO <sub>3</sub> -<br>358: C <sub>9</sub> H <sub>16</sub> O <sub>9</sub> N <sub>2</sub> NO <sub>3</sub> - or/and C <sub>10</sub> H <sub>16</sub> O <sub>10</sub> NO <sub>3</sub> -<br>370: C <sub>10</sub> H <sub>16</sub> O <sub>9</sub> N <sub>2</sub> NO <sub>3</sub> -<br>372: C <sub>10</sub> H <sub>16</sub> O <sub>10</sub> NNO <sub>3</sub> - or/and C <sub>9</sub> H <sub>14</sub> O <sub>10</sub> N <sub>2</sub> NO <sub>3</sub> - |
|                                 | SC2-2: 370+433        | 370: C <sub>10</sub> H <sub>16</sub> O <sub>9</sub> N <sub>2</sub> NO <sub>3</sub> -<br>433: C <sub>10</sub> H <sub>16</sub> O <sub>9</sub> N <sub>2</sub> NO <sub>3</sub> HNO <sub>3</sub> -                                                                                                                                                                                                                                                                                                                                                                                                                                                                                  |
|                                 | SC2-3: MT monomers 2  | 358- C <sub>10</sub> H <sub>16</sub> O <sub>10</sub> NO <sub>3</sub> -<br>386- C <sub>10</sub> H <sub>16</sub> O <sub>10</sub> N <sub>2</sub> NO <sub>3</sub> -<br>402- C <sub>10</sub> H <sub>16</sub> O <sub>11</sub> N <sub>2</sub> NO <sub>3</sub> -                                                                                                                                                                                                                                                                                                                                                                                                                       |
|                                 | SC3-1: MT dimers      | 538: C <sub>20</sub> H <sub>32</sub> O <sub>11</sub> N <sub>2</sub> NO <sub>3</sub> -<br>554: C <sub>20</sub> H <sub>32</sub> O <sub>12</sub> N <sub>2</sub> NO <sub>3</sub> -<br>570: C <sub>20</sub> H <sub>32</sub> O <sub>13</sub> N <sub>2</sub> NO <sub>3</sub> -<br>586: C <sub>20</sub> H <sub>32</sub> O <sub>14</sub> N <sub>2</sub> NO <sub>3</sub> -<br>602: C <sub>20</sub> H <sub>32</sub> O <sub>15</sub> N <sub>2</sub> NO <sub>3</sub> -                                                                                                                                                                                                                      |
|                                 | SC3-2: photooxidation | 500: C <sub>19</sub> H <sub>22</sub> O <sub>10</sub> N <sub>2</sub> NO <sub>3</sub> -<br>502: C <sub>19</sub> H <sub>24</sub> O <sub>10</sub> N <sub>2</sub> NO <sub>3</sub> -<br>508: C <sub>9</sub> F <sub>16</sub> H <sub>2</sub> O <sub>2</sub> NO <sub>3</sub> -<br>558: C <sub>10</sub> F <sub>18</sub> H <sub>2</sub> O <sub>2</sub> NO <sub>3</sub> -                                                                                                                                                                                                                                                                                                                  |
| <b>Urban background station</b> |                       |                                                                                                                                                                                                                                                                                                                                                                                                                                                                                                                                                                                                                                                                                |
| 200-350                         | UB1-2: nitrophenol    | 201: C <sub>6</sub> H <sub>5</sub> O <sub>3</sub> NNO <sub>3</sub> -<br>217: C <sub>6</sub> H <sub>5</sub> O <sub>4</sub> NNO <sub>3</sub> -<br>234: C <sub>7</sub> H <sub>8</sub> O <sub>5</sub> NO <sub>3</sub> -<br>241: C <sub>4</sub> H <sub>5</sub> O <sub>7</sub> NNO <sub>3</sub> -<br>288: C <sub>10</sub> H <sub>10</sub> O <sub>6</sub> NO <sub>3</sub> - or C <sub>6</sub> H <sub>10</sub> O <sub>9</sub> NO <sub>3</sub> -                                                                                                                                                                                                                                        |
|                                 | UB1-6: C7-8           | 250: C <sub>8</sub> H <sub>12</sub> O <sub>5</sub> NO <sub>3</sub> -<br>297: C <sub>7</sub> H <sub>9</sub> O <sub>8</sub> NNO <sub>3</sub> -<br>313: C <sub>8</sub> H <sub>13</sub> O <sub>8</sub> NNO <sub>3</sub> - or C <sub>8</sub> H <sub>12</sub> O <sub>5</sub> HNO <sub>3</sub> NO <sub>3</sub> -                                                                                                                                                                                                                                                                                                                                                                      |
|                                 | UB2-1: MT monomers 1  | 356: C <sub>9</sub> H <sub>14</sub> O <sub>9</sub> N <sub>2</sub> NO <sub>3</sub> - or C <sub>10</sub> H <sub>16</sub> O <sub>9</sub> NNO <sub>3</sub> -<br>388: C <sub>10</sub> H <sub>16</sub> O <sub>11</sub> NNO <sub>3</sub> - or C <sub>9</sub> H <sub>14</sub> O <sub>11</sub> N <sub>2</sub> NO <sub>3</sub> -<br>433: C <sub>10</sub> H <sub>17</sub> O <sub>12</sub> N <sub>3</sub> NO <sub>3</sub> -                                                                                                                                                                                                                                                                |
|                                 | UB2-2: MT monomers 2  | 355: C <sub>10</sub> H <sub>15</sub> O <sub>9</sub> NNO <sub>3</sub> -<br>357: C <sub>9</sub> H <sub>15</sub> O <sub>9</sub> N <sub>2</sub> NO <sub>3</sub> - or C <sub>10</sub> H <sub>17</sub> O <sub>9</sub> NNO <sub>3</sub> -<br>371: C <sub>10</sub> H <sub>15</sub> O <sub>10</sub> NNO <sub>3</sub> -<br>372: C <sub>9</sub> H <sub>14</sub> O <sub>10</sub> N <sub>2</sub> NO <sub>3</sub> -<br>387: C <sub>10</sub> H <sub>15</sub> O <sub>11</sub> NNO <sub>3</sub> -<br>403: C <sub>9</sub> H <sub>15</sub> O <sub>11</sub> N <sub>3</sub> NO <sub>3</sub> -                                                                                                       |
|                                 | B2-3: sesquiterpene 1 | 407: C <sub>15</sub> H <sub>23</sub> O <sub>8</sub> NNO <sub>3</sub> -<br>439: C <sub>15</sub> H <sub>23</sub> O <sub>10</sub> NNO <sub>3</sub> -<br>471: C <sub>15</sub> H <sub>23</sub> O <sub>12</sub> NNO <sub>3</sub> -<br>487: C <sub>15</sub> H <sub>23</sub> O <sub>13</sub> NNO <sub>3</sub> -<br>488: C <sub>15</sub> H <sub>24</sub> O <sub>13</sub> NNO <sub>3</sub> -                                                                                                                                                                                                                                                                                             |
| 350-500                         | UB2-4: MT monomers 3  | 356: C <sub>10</sub> H <sub>16</sub> O <sub>9</sub> NNO <sub>3</sub> - or C <sub>9</sub> H <sub>14</sub> O <sub>9</sub> N <sub>2</sub> NO <sub>3</sub> -<br>358: C <sub>10</sub> H <sub>16</sub> O <sub>10</sub> NO <sub>3</sub> -                                                                                                                                                                                                                                                                                                                                                                                                                                             |

|                         |                                                                                                                                                                                                                                                                                                                                                                                                                  |
|-------------------------|------------------------------------------------------------------------------------------------------------------------------------------------------------------------------------------------------------------------------------------------------------------------------------------------------------------------------------------------------------------------------------------------------------------|
|                         | 370: $C_{10}H_{16}O_9N_2NO_3^-$<br>372: $C_9H_{14}O_{10}N_2NO_3^-$<br>388: $C_{10}H_{16}O_{11}NNO_3^-$<br>433: $C_{10}H_{16}O_9N_2NO_3HNO_3^-$                                                                                                                                                                                                                                                                   |
| UB2-5: photooxidation 1 | 351: $C_{10}H_{11}O_9NNO_3^-$<br>370: $C_{10}H_{16}O_9N_2NO_3^-$                                                                                                                                                                                                                                                                                                                                                 |
| UB3-1: sesquiterpene 2  | 502: $C_{15}H_{24}O_{13}N_2NO_3^-$ or $C_{15}H_{23}O_{10}NHNO_3NO_3^-$<br>503: $C_{15}H_{23}O_{14}NNO_3^-$<br>518: $C_{15}H_{24}O_{14}N_2NO_3^-$ or $C_{15}H_{23}O_{11}NHNO_3NO_3^-$<br>519: $C_{15}H_{23}O_{15}NNO_3^-$<br>534: $C_{15}H_{24}O_{15}N_2NO_3^-$ or $C_{15}H_{23}O_{12}NHNO_3NO_3^-$<br>535: $C_{15}H_{23}O_{16}NNO_3^-$<br>550: $C_{15}H_{24}O_{16}N_2NO_3^-$ or $C_{15}H_{23}O_{13}NHNO_3NO_3^-$ |
| UB3-2: MT dimers        | 544: $C_{17}H_{26}O_{14}N_2NO_3^-$ or $C_{18}H_{26}O_{15}NO_3^-$<br>555: $C_{20}H_{31}O_{13}NNO_3^-$<br>556: $C_{20}H_{30}O_{14}NO_3^-$ or $C_{19}H_{30}O_{13}N_2NO_3^-$<br>560: $C_{18}H_{26}O_{16}NO_3^-$ or $C_{17}H_{26}O_{15}N_2NO_3^-$<br>570: $C_{20}H_{32}O_{13}N_2NO_3^-$<br>586: $C_{20}H_{32}O_{14}N_2NO_3^-$<br>602: $C_{20}H_{32}O_{15}N_2NO_3^-$<br>618: $C_{20}H_{32}O_{16}N_2NO_3^-$             |
| UB3-3: photooxidation 2 | 508: $C_9F_{16}H_2O_2NO_3^-$<br>558: $C_{10}F_{18}H_2O_2NO_3^-$<br>608: $C_{11}F_{20}H_2O_2NO_3^-$                                                                                                                                                                                                                                                                                                               |

500-650

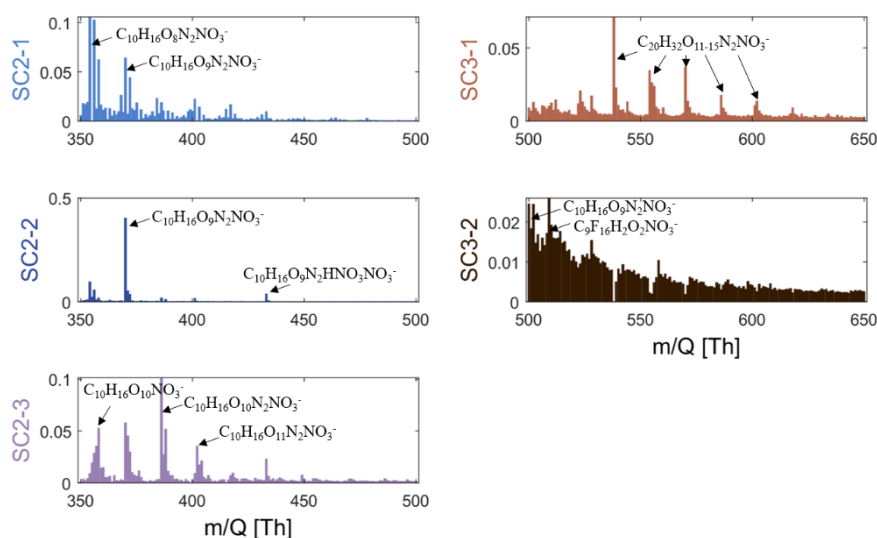

313

314

315

Figure S2. Mass spectra of selected PMF factors at the street canyon (SC). The left panel contains mass spectra for range 350-500 Th, and the right one for 500-650 Th.

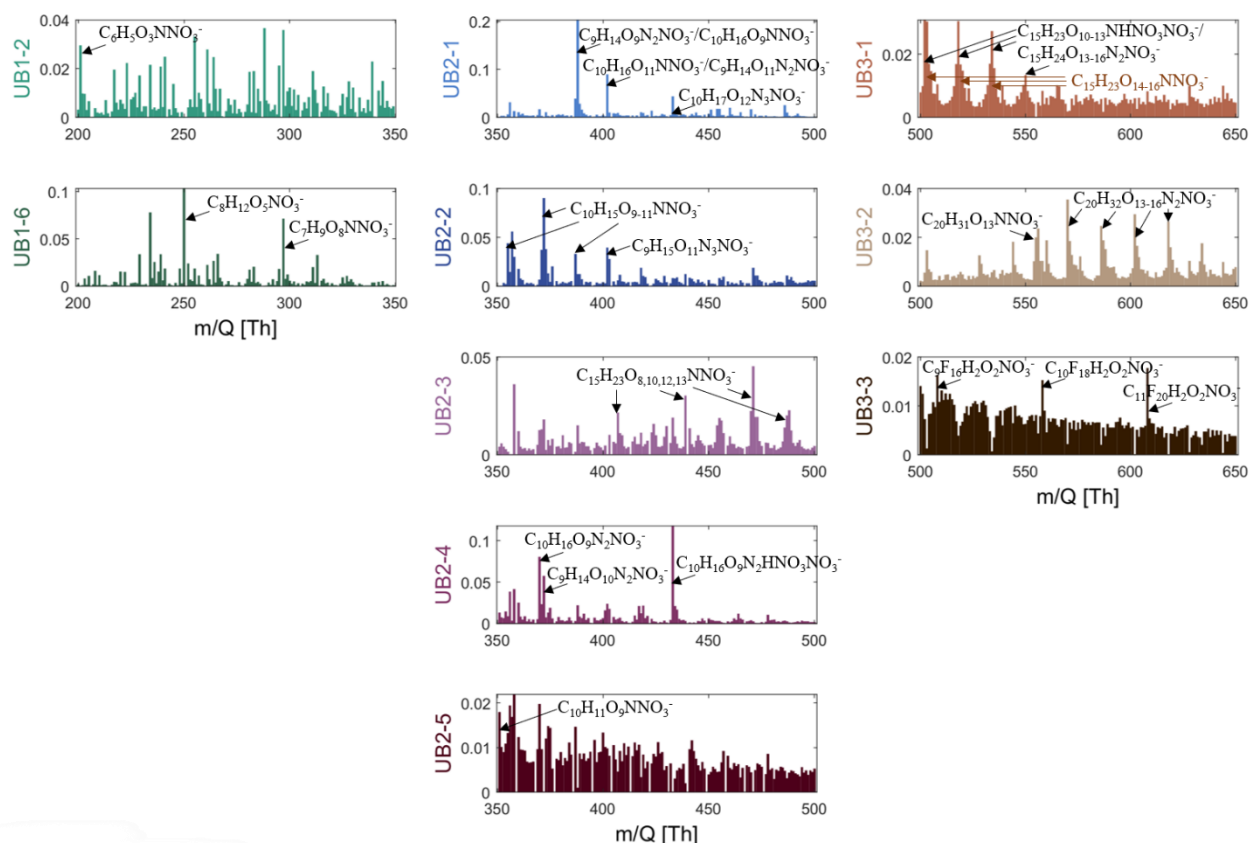

316

317 Figure S3. Mass spectra of selected PMF factors at the urban background station (UB). Left panel contains mass spectra  
318 for range 200-350 Th, middle one for 350-500 Th, and the right one for 500-650 Th.

### 319 S5. Ion fractions of selected factors

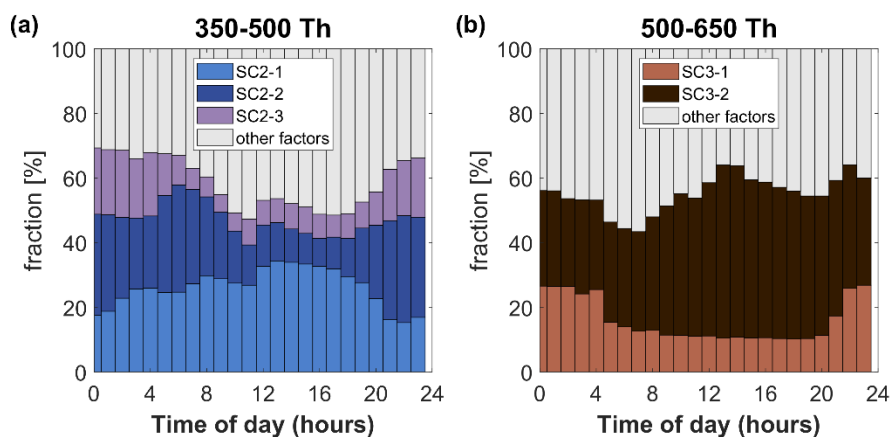

320

321 Figure S4. Diurnal variation of the selected factor fractions at street canyon (SC). The left panel contains variation for  
322 range 350-500 Th, and the right one for 500-650 Th.

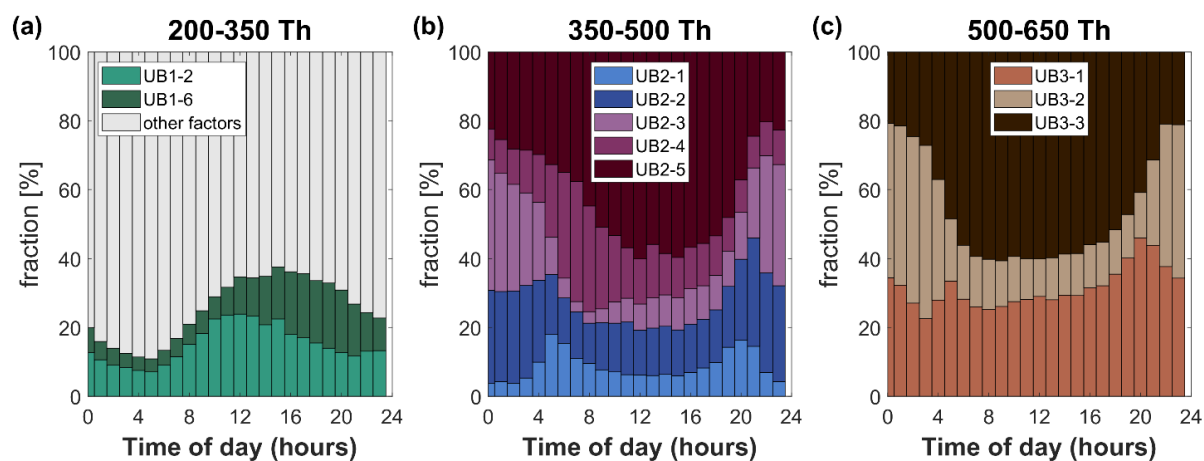

Figure S5. Diurnal variation of the selected factor fractions at urban background station (UB). The left panel contains variation for range 200-350 Th, middle one for 350-500 Th, and the right one for 500-650 Th.

## S6. Overview of not selected factors

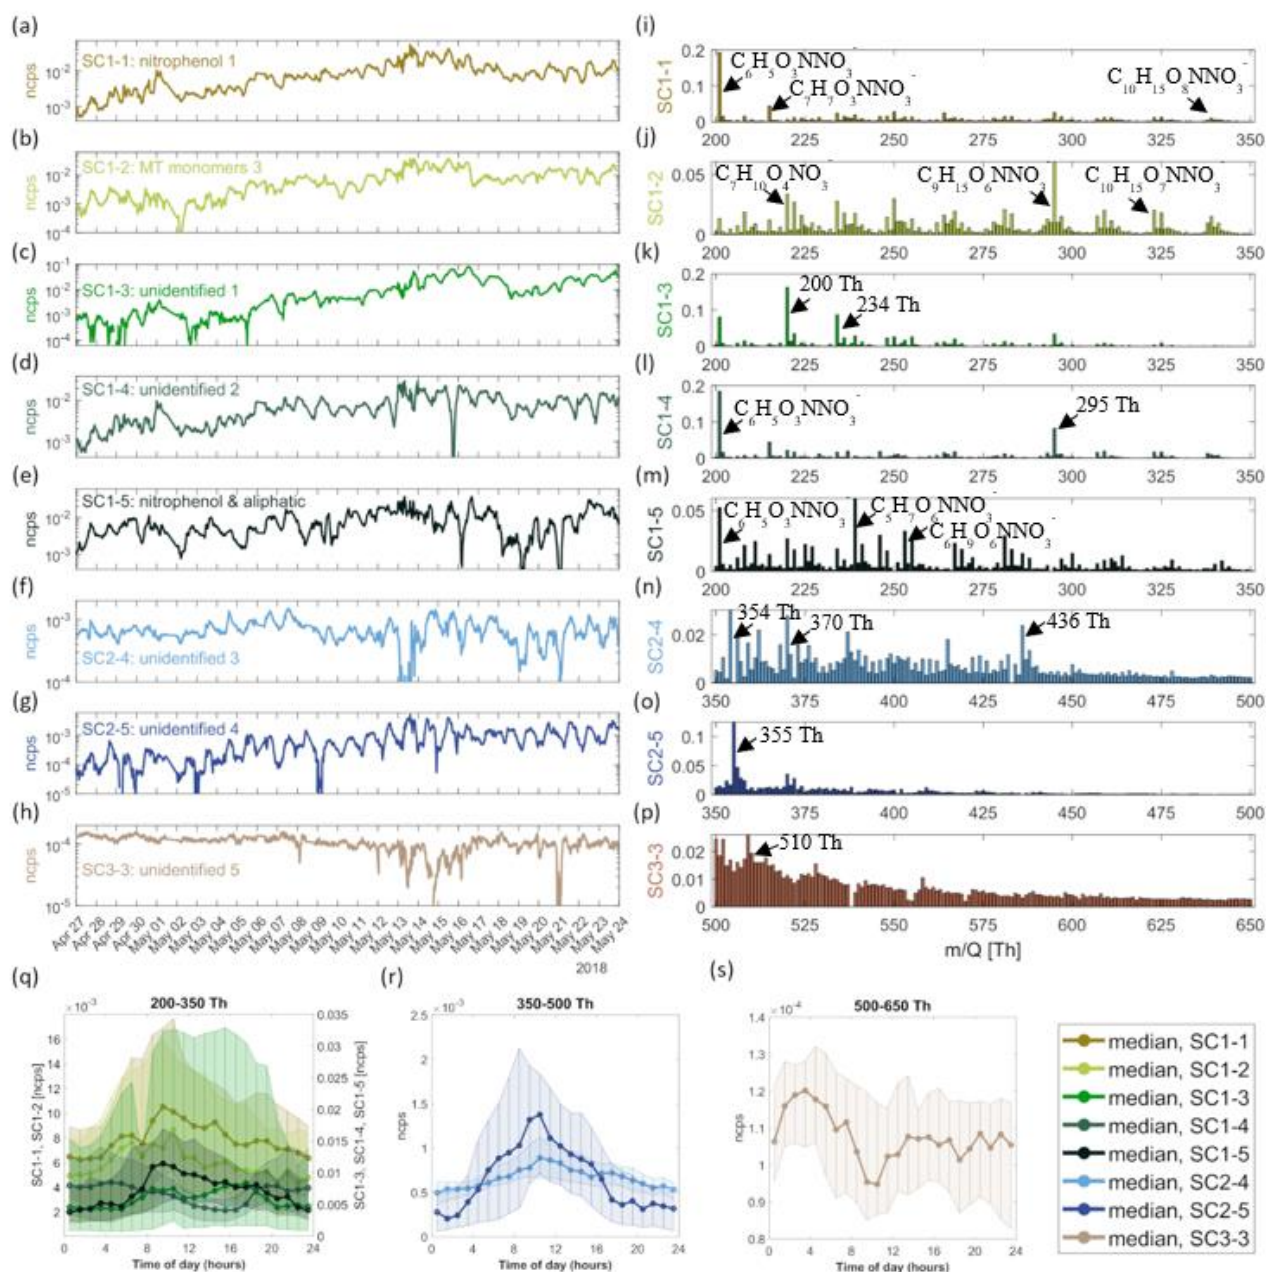

328

329

330

331

Figure S6. Time series of not selected PMF factors (a-h), their mass spectra (i-p), and diurnal variation (q-s) at the street canyon (SC). The median diurnal variation is shown as a solid line with markers; the 25<sup>th</sup> and 75<sup>th</sup> percentile ranges are presented as shaded areas.

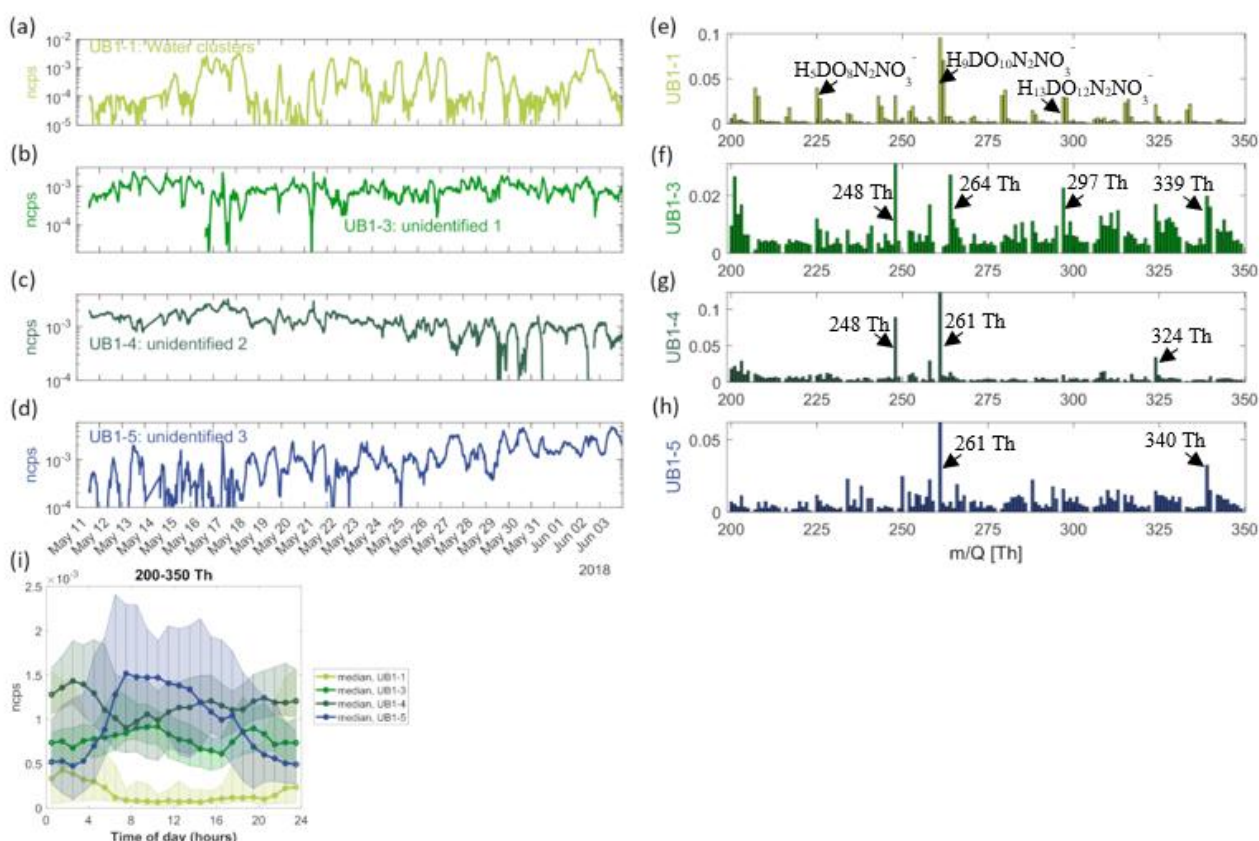

332

333 Figure S7. Time series of not selected PMF factors (a-d), their mass spectra (e-h), and their diurnal variation (i) at the  
 334 urban background station (UB). The median diurnal variation is shown as a solid line with markers; the 25<sup>th</sup> and 75<sup>th</sup>  
 335 percentile ranges are presented as shaded areas.

336 Table S3. Suggested characterization of not selected factors at both stations. The table contains information about  
 337 probable precursors, oxidants, terminators of formation mechanisms for HOM as well as information about diurnal  
 338 variation profile (daytime (D) and nighttime (N)), fraction percentage (%) and potential inhibitors for factors. The  
 339 possibility of influence of a variable on factor is marked by yes, M (maybe), or no.

| Range<br>[Th]      | Factor              | Precursor      | Oxidant |                 |                | Terminator |                 |                 | Diurnal<br>peak time | Fraction % |       |
|--------------------|---------------------|----------------|---------|-----------------|----------------|------------|-----------------|-----------------|----------------------|------------|-------|
|                    |                     |                | OH      | NO <sub>3</sub> | O <sub>3</sub> | NO         | RO <sub>2</sub> | HO <sub>2</sub> |                      | all        | range |
| Street canyon      |                     |                |         |                 |                |            |                 |                 |                      |            |       |
| 200-350            | SC1-1 <sup>MS</sup> | AVOCs          | M       | no              | M              | M          | no              | M               | 9                    | 18.8       | 20.5  |
|                    | SC1-2 <sup>MS</sup> | BVOCs          | M       | no              | M              | yes        | no              | M               | 10                   | 15.8       | 17.3  |
|                    | SC1-3               | AVOCs          | M       | no              | M              | no         | no              | M               | 17                   | 24.9       | 27.3  |
|                    | SC1-4               | VOCs           | M       | M               | no             | yes        | no              | M               | 4                    | 15.1       | 16.4  |
|                    | SC1-5 <sup>MS</sup> | AVOCs          | yes     | no              | M              | yes        | no              | M               | 9                    | 16.9       | 18.5  |
| 350-500            | SC2-4               | VOCs           | yes     | no              | M              | M          | no              | M               | 10                   | 1.4        | 17.1  |
|                    | SC2-5               | VOCs           | yes     | no              | M              | M          | no              | M               | 10                   | 1.5        | 19.5  |
| 500-650            | SC3-3               | noise          | -       | -               | -              | -          | -               | -               | 3                    | 0.2        | 39.0  |
| Background station |                     |                |         |                 |                |            |                 |                 |                      |            |       |
| 200-350            | UB1-1               | Water clusters | -       | -               | -              | -          | -               | -               | 1                    | 5.3        | 9.2   |
|                    | UB1-3               | VOCs           | yes     | yes             | M              | yes        | no              | M               | 10                   | 8.8        | 16.3  |
|                    | UB1-4               | VOCs           | M       | M               | M              | no         | no              | M               | 2                    | 13.1       | 24.2  |



S7. Overview of the measured VOCs at the street canyon

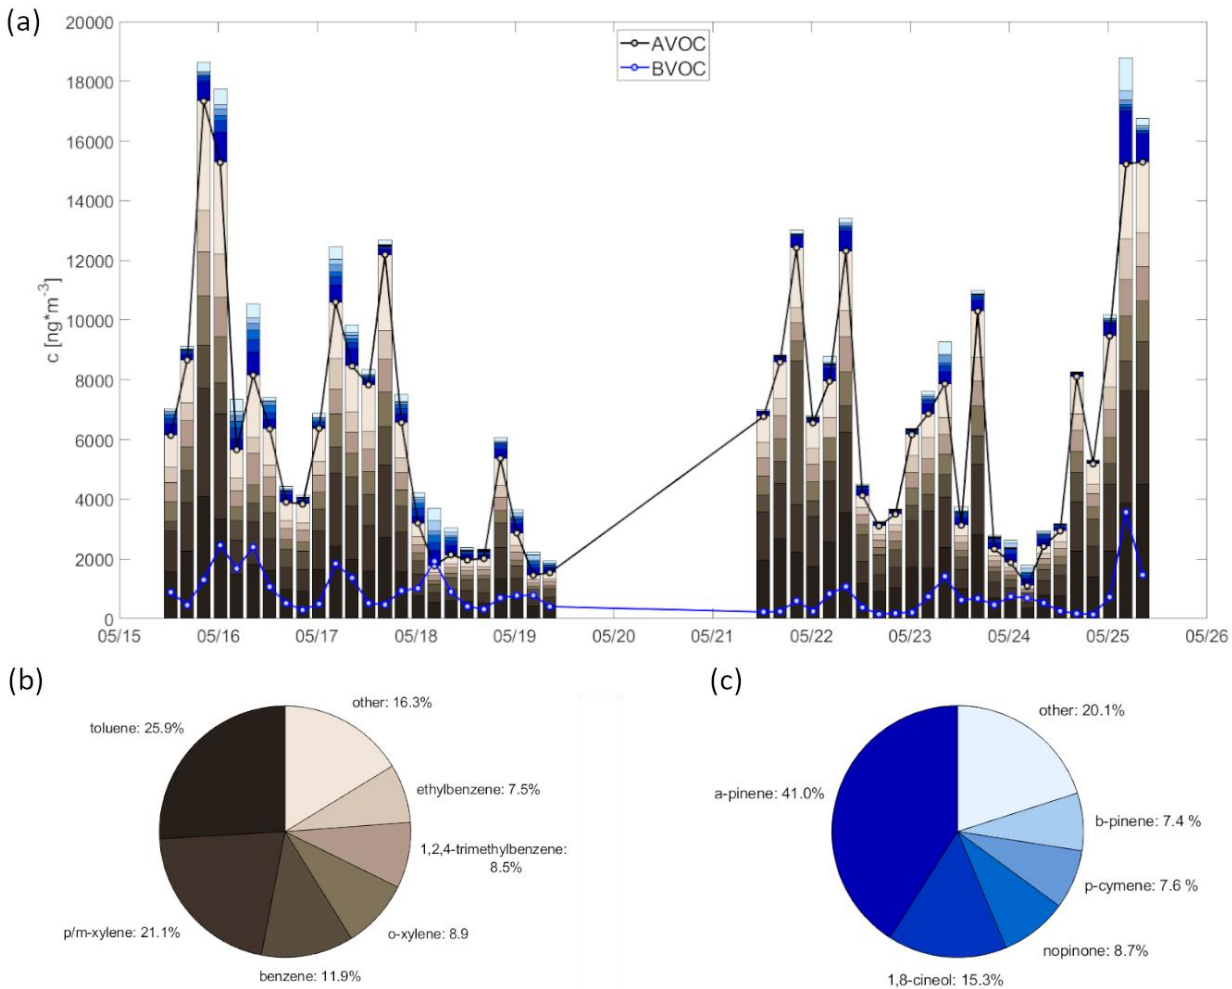

Figure S8. Time series of measured VOCs concentrations (a) and the fraction of an individual AVOC (b) and BVOC (c) at street canyon. BVOCs and AVOCs which do not make more than 5% of corresponding total BVOC and total AVOC concentrations are group as “others”.

S8. Correlations of observed factors

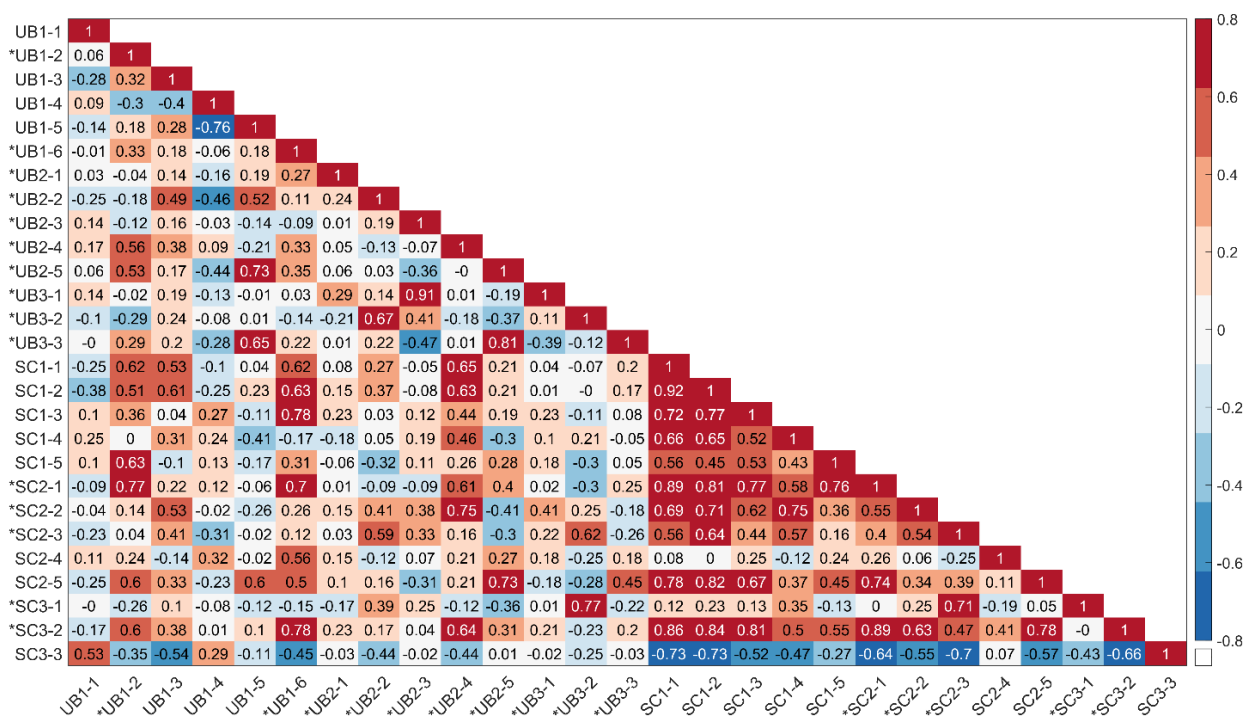

348

349 Figure S9. Heatmap of Pearson correlation coefficients for time series of factors at the street canyon (SC) and the urban  
350 background stations (UB). Selected factors are marked with \*.

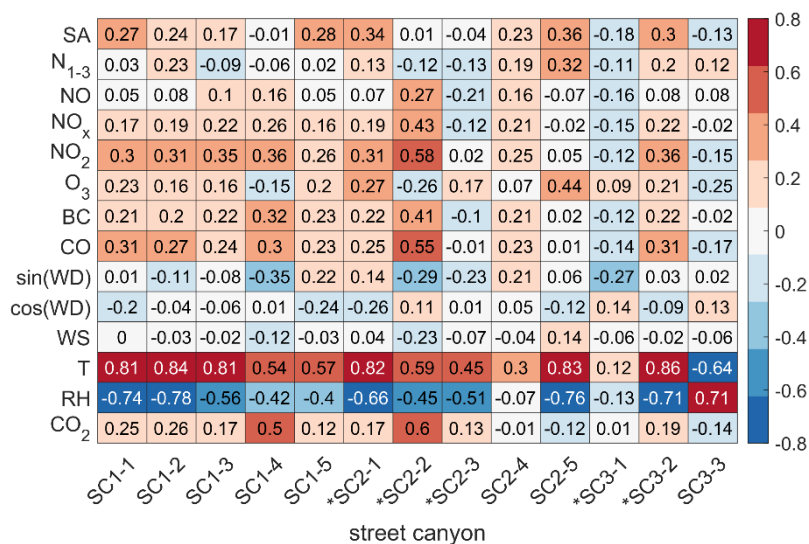

351

352 Figure S10. Heatmap of Pearson correlation coefficients for time series of factors and other variables at the street canyon  
353 (SC). Selected factors are marked with \*. Variables used for correlation analysis consist of concentrations of sulfuric acid  
354 (SA), sub-3 nm particles (N<sub>1-3</sub>), NO, NO<sub>x</sub>, NO<sub>2</sub>, O<sub>3</sub>, black carbon (BC), carbon oxide (CO), sinus and cosine of wind  
355 direction (sin(WD), cos(WD)), wind speed (WS), temperature (T), relative humidity (RH), and carbon dioxide (CO<sub>2</sub>)  
356 (Okuljar et al., 2021).

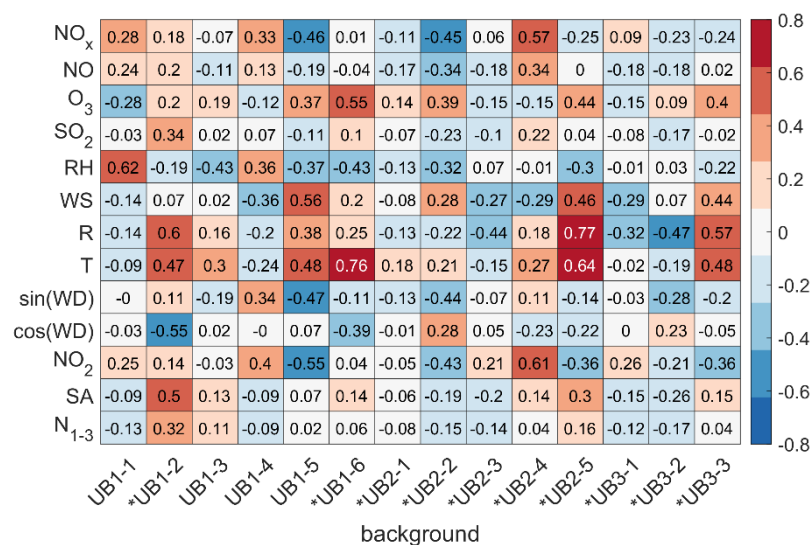

357

358 Figure S11. Heatmap of Pearson correlation coefficients for time series of factors and meteorological variables at the  
 359 urban background station (UB). Selected factors are marked with \*. Variables used for correlation analysis consist of  
 360 concentrations of NO<sub>x</sub>, NO, O<sub>3</sub>, sulfur dioxide (SO<sub>2</sub>), relative humidity (RH), wind speed (WS), global radiation (R),  
 361 temperature (T), sinus and cosine of wind direction (sin(WD), cos(WD)), NO<sub>2</sub>, sulfuric acid (SA), sub-3 nm particles (N<sub>1-3</sub>).  
 362 3) (Okuljar et al., 2021).

### 363 S9. Workday -weekend comparison

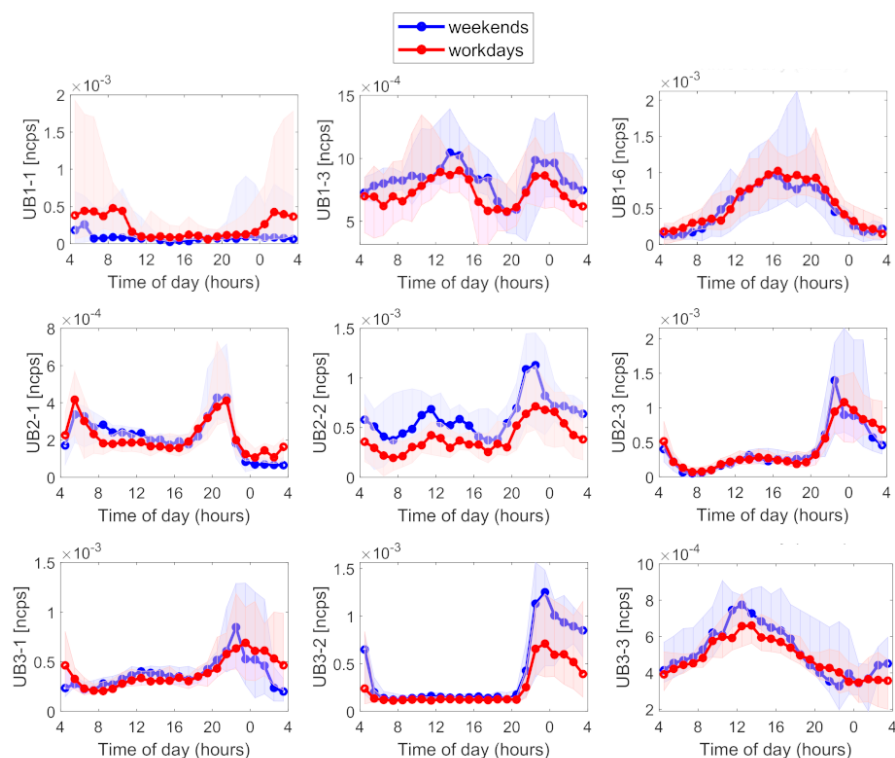

364

365 Figure S13. Examples of the diurnal variation of factors separated in workdays and weekends at the urban background  
 366 station (UB).

367

## 368 Bibliography

- 369 Canonaco, F., Crippa, M., Slowik, J. G., Baltensperger, U., & Prévôt, A. S. H. (2013). SoFi, an IGOR-based interface  
370 for the efficient use of the generalized multilinear engine (ME-2) for the source apportionment: ME-2 application  
371 to aerosol mass spectrometer data. *Atmospheric Measurement Techniques*, 6(12), 3649–3661.  
372 <https://doi.org/10.5194/AMT-6-3649-2013>
- 373 Dam, M., Draper, D. C., Marsavin, A., Fry, J. L., & Smith, J. N. (2022). Observations of gas-phase products from the  
374 nitrate-radical-initiated oxidation of four monoterpenes. *Atmospheric Chemistry and Physics*, 22(13), 9017–9031.  
375 <https://doi.org/10.5194/ACP-22-9017-2022>
- 376 Ehn, M., Thornton, J. A., Kleist, E., Sipilä, M., Junninen, H., Pullinen, I., Springer, M., Rubach, F., Tillmann, R., Lee,  
377 B., Lopez-Hilfiker, F., Andres, S., Acir, I. H., Rissanen, M., Jokinen, T., Schobesberger, S., Kangasluoma, J.,  
378 Kontkanen, J., Nieminen, T., ... Mentel, T. F. (2014). A large source of low-volatility secondary organic aerosol.  
379 *Nature*, 506(7489), 476–479. <https://doi.org/10.1038/nature13032>
- 380 Guo, Y., Yan, C., Liu, Y., Qiao, X., Zheng, F., Zhang, Y., Zhou, Y., Li, C., Fan, X., Lin, Z., Feng, Z., Zhang, Y.,  
381 Zheng, P., Tian, L., Nie, W., Wang, Z., Huang, D., Daellenbach, K. R., Yao, L., ... Kulmala, M. (2022). Seasonal  
382 variation in oxygenated organic molecules in urban Beijing and their contribution to secondary organic aerosol.  
383 *Atmospheric Chemistry and Physics*, 22(15), 10077–10097. <https://doi.org/10.5194/ACP-22-10077-2022>
- 384 Liu, Y., Nie, W., Li, Y., Ge, D., Liu, C., Xu, Z., Chen, L., Wang, T., Wang, L., Sun, P., Qi, X., Wang, J., Xu, Z., Yuan,  
385 J., Yan, C., Zhang, Y., Huang, D., Wang, Z., Donahue, N. M., ... Dİng, A. (2021). Formation of condensable  
386 organic vapors from anthropogenic and biogenic volatile organic compounds (VOCs) is strongly perturbed by  
387 NO<sub>x</sub> in eastern China. *Atmospheric Chemistry and Physics*, 21(19), 14789–14814. [https://doi.org/10.5194/ACP-](https://doi.org/10.5194/ACP-21-14789-2021)  
388 [21-14789-2021](https://doi.org/10.5194/ACP-21-14789-2021)
- 389 Okuljar, M., Kuuluvainen, H., Kontkanen, J., Garmash, O., Olin, M., Niemi, J. V., Timonen, H., Kangasluoma, J.,  
390 Tham, Y. J., Baalbaki, R., Sipilä, M., Salo, L., Lintusaari, H., Portin, H., Teinilä, K., Aurela, M., Dal Maso, M.,  
391 Rönkkö, T., Petäjä, T., & Paasonen, P. (2021). Measurement report: The influence of traffic and new particle  
392 formation on the size distribution of 1-800nm particles in Helsinki-a street canyon and an urban background  
393 station comparison. *Atmospheric Chemistry and Physics*, 21(13), 9931–9953. [https://doi.org/10.5194/ACP-21-](https://doi.org/10.5194/ACP-21-9931-2021)  
394 [9931-2021](https://doi.org/10.5194/ACP-21-9931-2021)
- 395 Pullinen, I., Schmitt, S., Kang, S., Sarrafzadeh, M., Schlag, P., Andres, S., Kleist, E., Mentel, T. F., Rohrer, F.,  
396 Springer, M., Tillmann, R., Wildt, J., Wu, C., Zhao, D., Wahner, A., & Kiendler-Scharr, A. (2020). Impact of  
397 NO<sub>x</sub> on secondary organic aerosol (SOA) formation from  $\alpha$ -pinene and  $\beta$ -pinene photooxidation: The role of  
398 highly oxygenated organic nitrates. *Atmospheric Chemistry and Physics*, 20(17), 10125–10147.  
399 <https://doi.org/10.5194/ACP-20-10125-2020>
- 400 Yan, C., Nie, W., Aijälä, M., Rissanen, M. P., Canagaratna, M. R., Massoli, P., Junninen, H., Jokinen, T., Sarnela, N.,  
401 Häme, S. A. K., Schobesberger, S., Canonaco, F., Yao, L., Prévôt, A. S. H., Petäjä, T., Kulmala, M., Sipilä, M.,  
402 Worsnop, D. R., & Ehn, M. (2016). Source characterization of highly oxidized multifunctional compounds in a  
403 boreal forest environment using positive matrix factorization. *Atmospheric Chemistry and Physics*, 16(19),  
404 12715–12731. <https://doi.org/10.5194/acp-16-12715-2016>

405 Yan, C., Nie, W., Vogel, A. L., Dada, L., Lehtipalo, K., Stolzenburg, D., Wagner, R., Rissanen, M. P., Xiao, M.,  
406 Ahonen, L., Fischer, L., Rose, C., Bianchi, F., Gordon, H., Simon, M., Heinritzi, M., Garmash, O., Roldin, P.,  
407 Dias, A., ... Worsnop, D. R. (2020). Size-dependent influence of nox on the growth rates of organic aerosol  
408 particles. *Science Advances*, 6(22), 4945–4972.  
409 [https://doi.org/10.1126/SCIADV.AAY4945/SUPPL\\_FILE/AAY4945\\_SM.PDF](https://doi.org/10.1126/SCIADV.AAY4945/SUPPL_FILE/AAY4945_SM.PDF)

410
